# Supplementary material for: Luminescent hybrid materials based on covalent attachment of Eu(iii)-tris(bipyridinedicarboxylate) in the mesoporous silica host MCM-41
Source: Royal Society of Chemistry journal article supplement (doi:10.1039/c3dt52096j), 2014-01-01
Supplement: c3dt52096j1.pdf [file c3dt52096j1.pdf]

# Luminescent hybrid materials based on covalent attachment of Eu(III)-tris(bipyridinedicarboxylate) in the mesoporous silica host MCM-41

Maturi Ilibi,<sup>a</sup> Thiago Branquinho de Queiroz,<sup>b</sup> Jinjun Ren,<sup>a</sup> Andrea Simone Stucchi de Camargo,<sup>b\*</sup> and Hellmut Eckert<sup>a,b\*</sup>

<sup>a</sup>Institut für Physikalische Chemie, WWU Münster  
Corrensstraße 28-30  
D-48149 Münster, Germany

<sup>b</sup>Physics Institute of São Carlos,  
University of São Paulo,  
São Carlos, SP 13566-590, Brazil.

## Supporting Materials Section

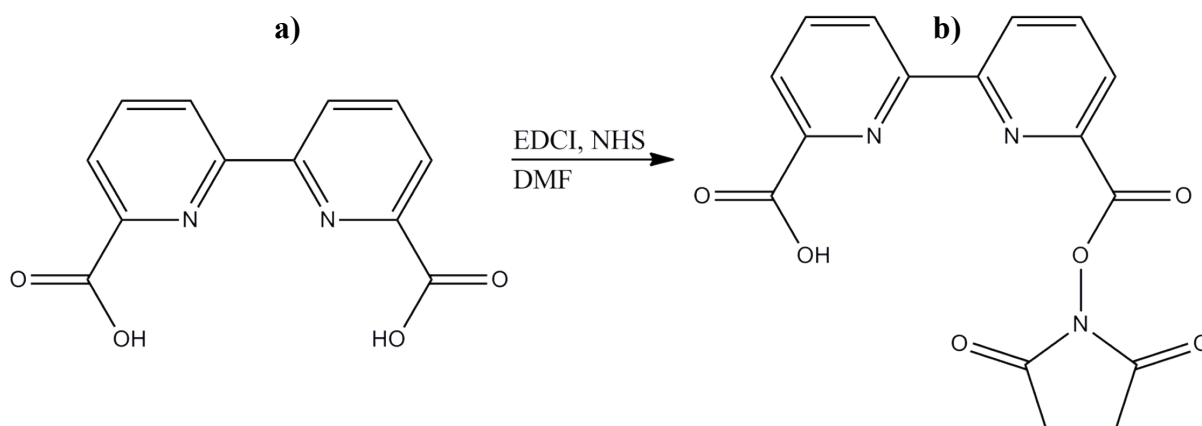

**Figure S1:** activating scheme of the ligand : a) 2,2'- bipyridine-6,6'-bicarboxylic acid (L<sub>2</sub>), b) NHS activated L<sub>2</sub>

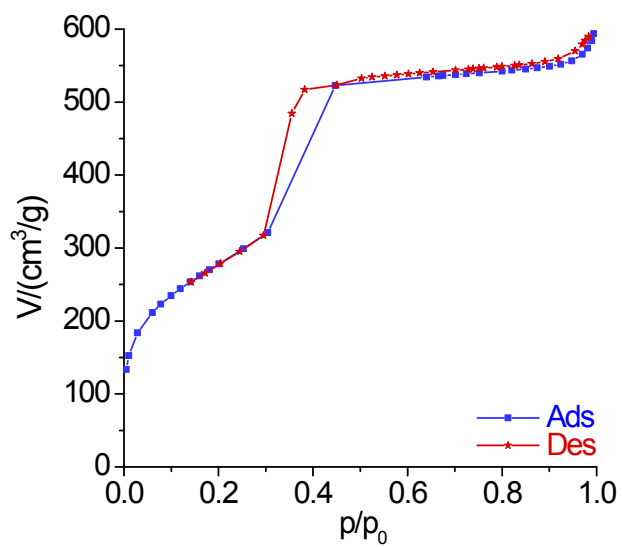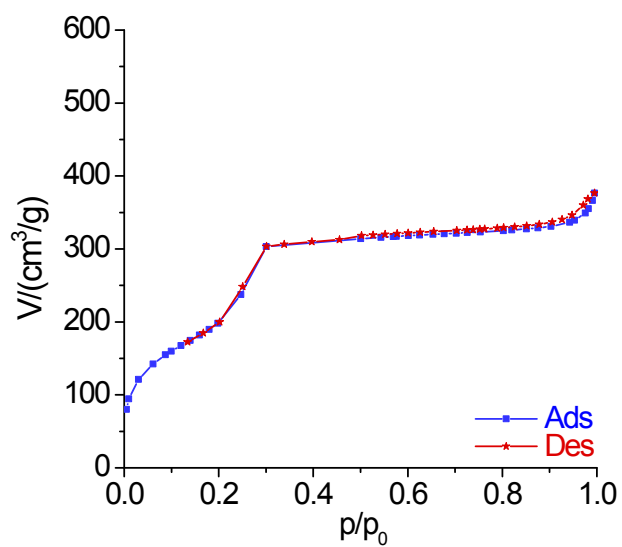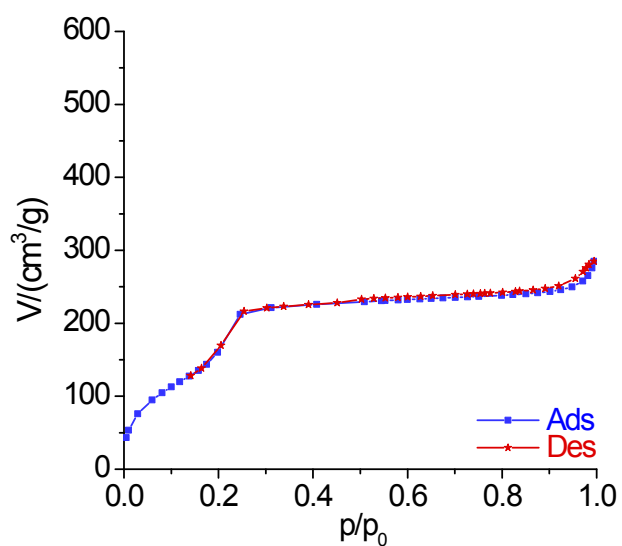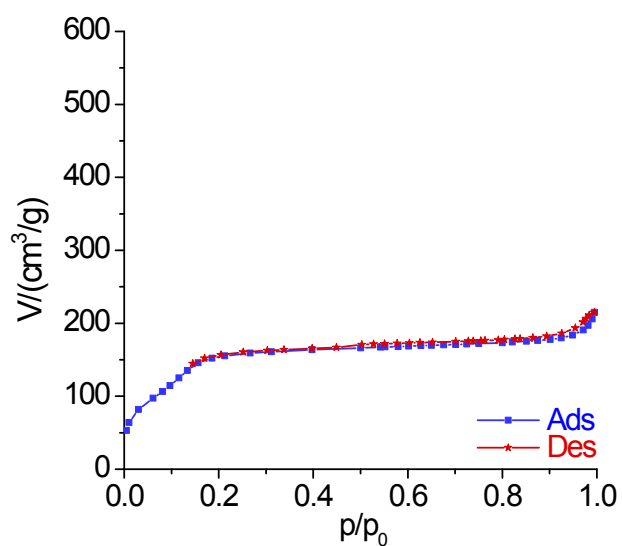

**Figure S2:** Adsorption-desorption isotherms of sample 1 (top, left), sample 2 (top right), sample 3 (bottom, left) and sample 4 (bottom, right).

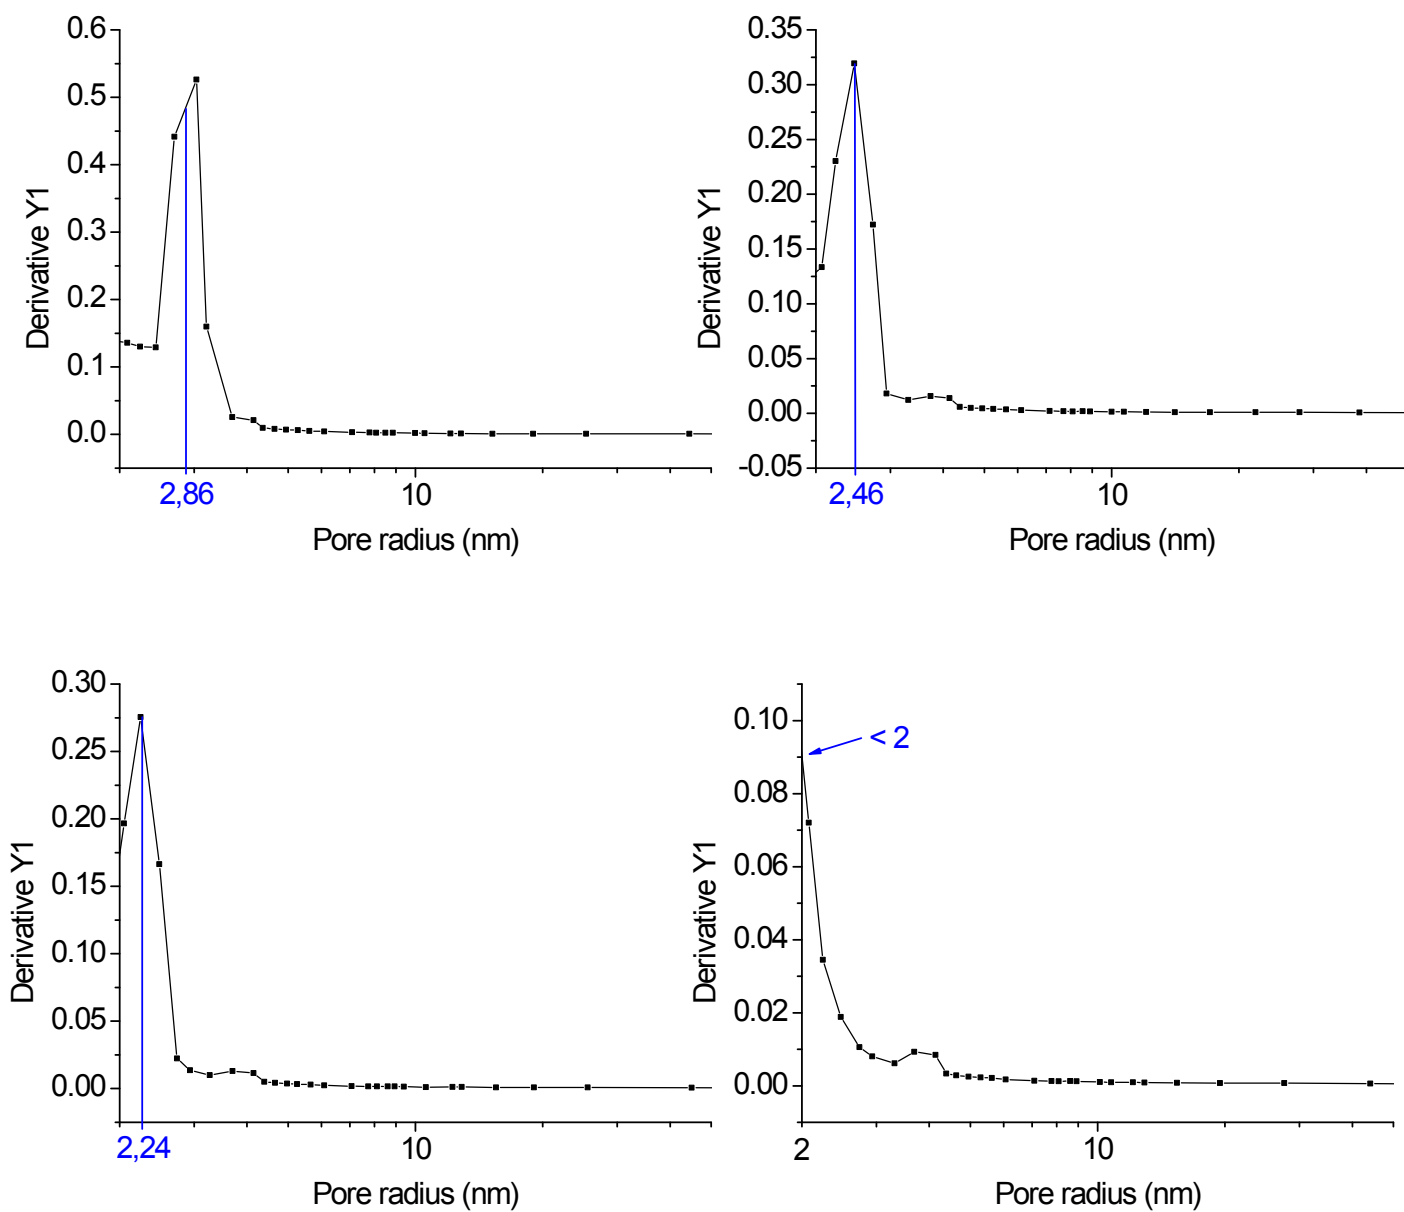

**Figure S3:** Pore radius distribution of sample 1 (top, left), sample 2 (top, right), sample 3 (bottom, left), and sample 4 (bottom, right), determined via the Barret-Joyner-Halenda (BJH) method.

**Table S4:** Surface characterization data of Samples 1-4

| Silica materials | Pore diameter<br>[nm] | Mesoporous volume<br>[cm <sup>3</sup> /g] | BET surface area<br>[m <sup>2</sup> /g] |
|------------------|-----------------------|-------------------------------------------|-----------------------------------------|
| Sample 1         | 2.86                  | 232                                       | 1012                                    |
| Sample 2         | 2.46                  | 169                                       | 684                                     |
| Sample 3         | 2.24                  | 147                                       | 638                                     |
| Sample 4         | < 2                   | 143                                       | 621                                     |

**Table S5:** <sup>29</sup>Si signal area fractions observed in samples 1, 3, 4, and 5.

| Materials  | Q <sup>4</sup> (%) | Q <sup>3</sup> (%) | T <sup>3</sup> (%) | M <sup>1</sup> (%) |
|------------|--------------------|--------------------|--------------------|--------------------|
| Sample (1) | 66.9               | 33.1               | -                  | -                  |
| Sample (3) | 74.7               | 1.7                | 14.1               | 9.5                |
| Sample (4) | 73.6               | 6.7                | 12.0               | 7.7                |
| Sample (5) | 73.3               | 7.3                | 12.0               | 7.4                |

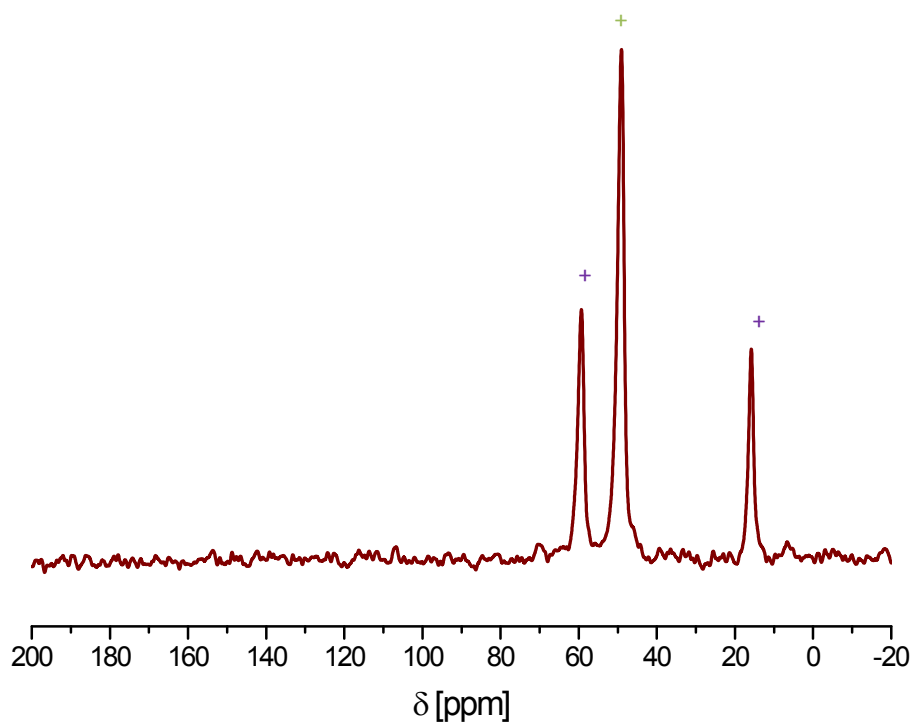

**Figure S6:**  $^{13}\text{C}\{^1\text{H}\}$  CP-MAS NMR spectrum of sample **8**. Aside from solvent impurities (ethanol, methanol, marked by “+”), no signals arising from Eu bound ligands are observable.

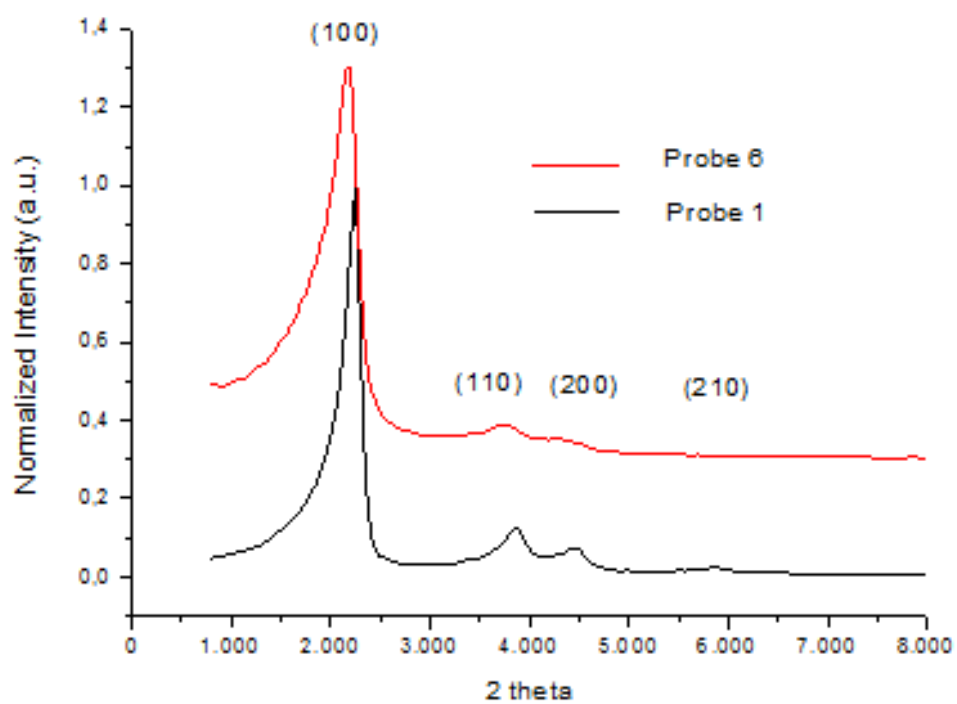

**Figure S7:** Small-angle X-ray scattering data of samples 1 and 6, confirming retention of the mesoporous character after functionalization and complex formation within the mesopores.

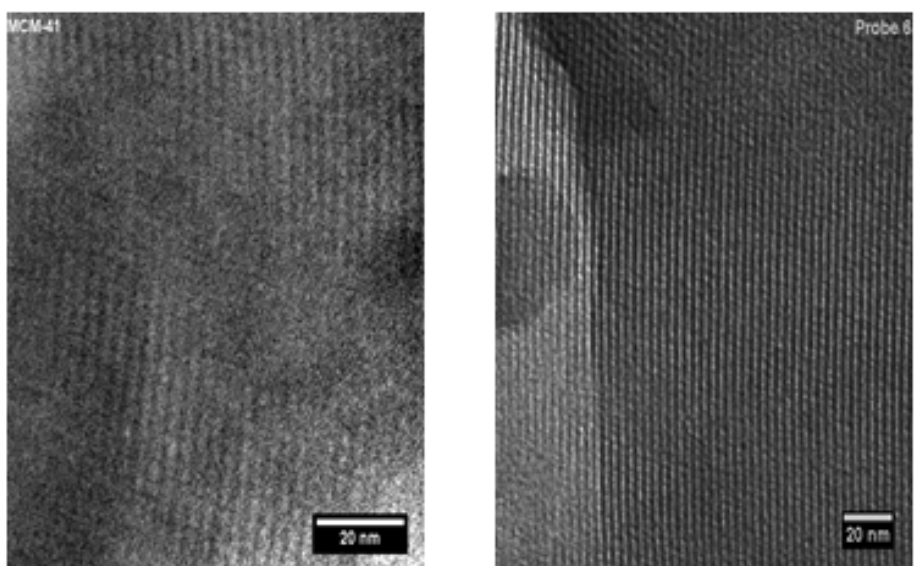

**Figure S8:** Transmission electron micrographs of samples 1 and 6, confirming retention of the mesoporous character after functionalization and complex formation within the mesopores.
